# Supplementary material for: Morphology control of silicone/poly(methyl methacrylate) (elastic/glassy) composite particles
Source: Royal Society of Chemistry journal article supplement (doi:10.1039/d0py01102a), 2020-01-01
Supplement: d0py01102a1.pdf [file d0py01102a1.pdf]

## Supporting Information

# Morphology Control of Silicone/Poly(methyl methacrylate) (Elastic/glassy) Composite Particles

*Ken Mukai, Yuki Fujii, Mitsuyoshi Yamane, Toyoko Suzuki, Hideto Minami\**

Department of Chemical Science and Engineering, Graduated School of Engineering, Kobe University, Kobe 657-8501, Japan  
Tel/Fax: (+81)-78-803-6197  
E-mail: minamihi@kobe-u.ac.jp

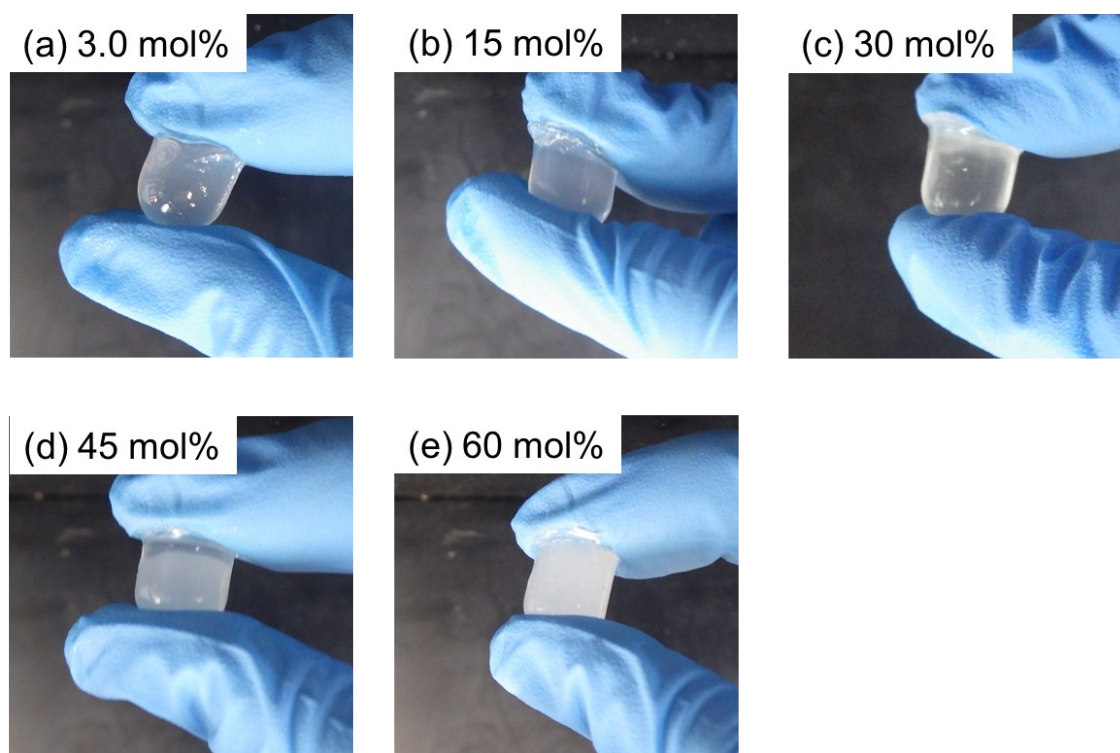

**Figure S1.** Visual appearances (a-e) of silicone prepared by thiol-ene reaction between SH-silicone and TTT in bulk with various amount of AIBN; (a) 3.0 mol%; (b) 15 mol%; (c) 30 mol%; (d) 45 mol%; (e) 60 mol%

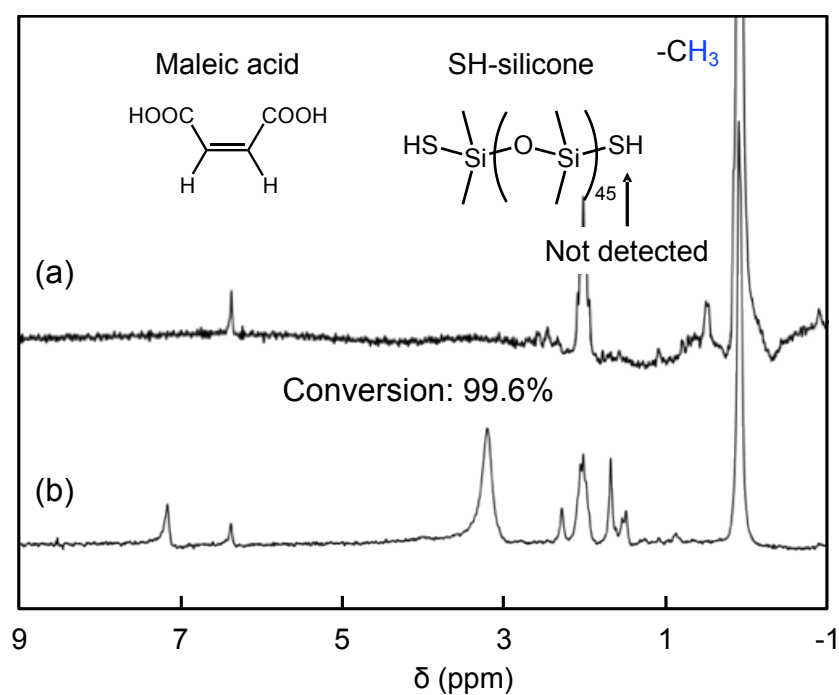

**Figure S2**  $^1\text{H}$  NMR chart of the extracted sample using acetone- $d_6$

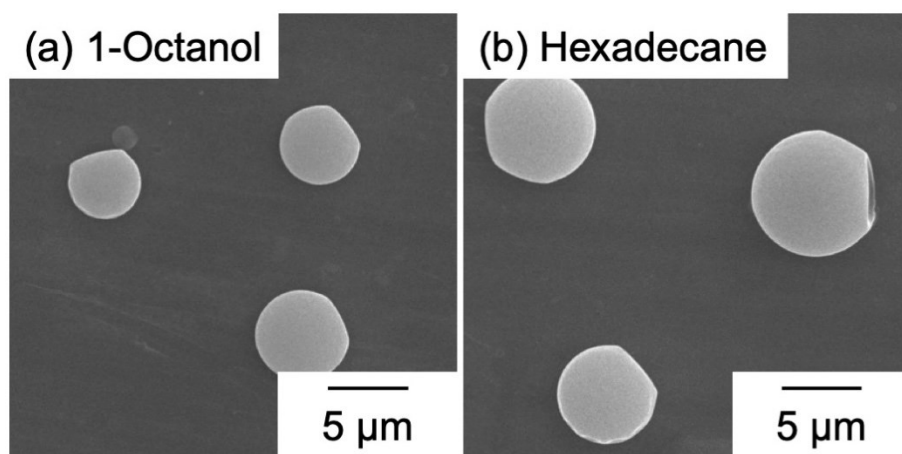

**Figure S3.** SEM images of silicone particles prepared by thiol-ene reaction in suspension system using 1-octanol (a) and hexadecane (b)

(c) Sea-island

118°

(d) Core-shell

90°

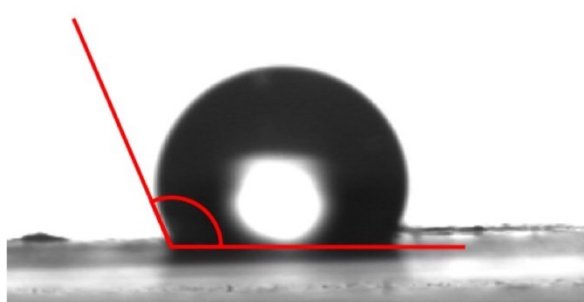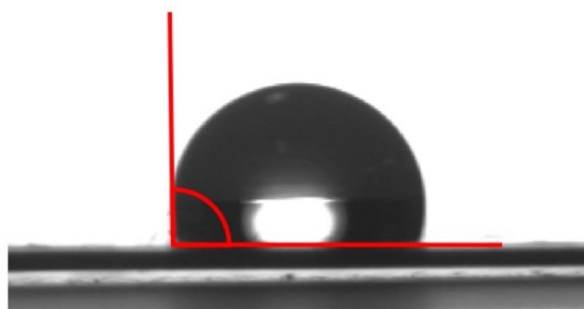

**Figure S4.** Visual images of the water contact angle on the film prepared from sea-island structure (a) and core-shell structure (b) composite particles.
